# Supplementary material for: Resistance to Extreme Stresses by a Newly Discovered Japanese Tardigrade Species, Macrobiotus kyoukenus (Eutardigrada, Macrobiotidae)
Source: MDPI journal article supplement (doi:10.3390/insects13070634), 2022-07-15
Supplement: s1 [file s1]

**Table S1.** Measurements (in  $\mu\text{m}$ ) and *pt* values of morphological structures of the holotype and paratypes of *Macrobiotus kyoukenus* sp. nov.

| CHARACTER                      | N  | RANGE |   |      |      |   | MEAN |      | SD   |     | Holotype |      | Thorpe's Normalization |        |         |        |
|--------------------------------|----|-------|---|------|------|---|------|------|------|-----|----------|------|------------------------|--------|---------|--------|
|                                |    | μm    |   | pt   |      |   | μm   | pt   | μm   | pt  | μm       | pt   | b                      | a*     | p_value |        |
| Body length                    | 30 | 214   | – | 535  | 748  | – | 1183 | 362  | 934  | 79  | 105      | 363  | 924                    | 1.4335 | 90.2592 | 0.4738 |
| Buccopharyngeal tube           |    |       |   |      |      |   |      |      |      |     |          |      |                        |        |         |        |
| Buccal tube length             | 30 | 28.5  | – | 48.1 |      | – |      | 38.5 | –    | 5.6 | –        | 39.2 | –                      | 1.0000 | 0.0000  | 1.0000 |
| Stylet support insertion point | 30 | 21.5  | – | 37.8 | 70.4 | – | 79.4 | 29.2 | 75.8 | 4.5 | 2.0      | 29.3 | 74.8                   | 1.0624 | -2.9876 | 0.9606 |
| Buccal tube external width     | 30 | 3.8   | – | 7.4  | 12.4 | – | 16.4 | 5.6  | 14.4 | 1.1 | 1.0      | 6.0  | 15.2                   | 1.3046 | -2.6166 | 0.7416 |
| Buccal tube internal width     | 30 | 2.5   | – | 5.2  | 8.6  | – | 11.6 | 3.9  | 10.1 | 0.9 | 1.0      | 4.5  | 11.6                   | 1.4894 | -2.5604 | 0.6617 |
| Placoid lengths                |    |       |   |      |      |   |      |      |      |     |          |      |                        |        |         |        |
| Macroplacoid 1                 | 30 | 7.2   | – | 14.3 | 22.3 | – | 31.7 | 10.3 | 26.8 | 2.1 | 2.6      | 10.3 | 26.3                   | 1.1868 | -1.6845 | 0.6733 |
| Macroplacoid 2                 | 30 | 4.1   | – | 8.3  | 13.3 | – | 17.8 | 5.9  | 15.3 | 1.3 | 1.3      | 5.7  | 14.5                   | 1.3478 | -2.8446 | 0.6579 |
| Microplacoid                   | 30 | 1.8   | – | 3.9  | 5.0  | – | 8.8  | 2.5  | 6.5  | 0.6 | 0.9      | 3.1  | 7.9                    | 1.0167 | 0.7512  | 0.9399 |
| Macroplacoid row               | 30 | 12.3  | – | 22.8 | 40.0 | – | 50.3 | 17.3 | 45.0 | 3.2 | 3.1      | 16.9 | 43.1                   | 1.1409 | -2.7832 | 0.8176 |
| Placoid row                    | 30 | 14.7  | – | 27.3 | 47.1 | – | 59.7 | 20.5 | 53.2 | 3.6 | 3.4      | 20.9 | 53.4                   | 1.1066 | -1.7757 | 0.8487 |
| Claw 1 heights                 |    |       |   |      |      |   |      |      |      |     |          |      |                        |        |         |        |
| External primary branch        | 30 | 7.3   | – | 11.1 | 21.9 | – | 28.9 | 9.5  | 24.8 | 1.1 | 1.5      | 10.2 | 25.9                   | 0.7394 | 3.2172  | 0.4294 |
| External secondary branch      | 30 | 6.1   | – | 9.5  | 15.1 | – | 22.1 | 7.3  | 19.1 | 0.9 | 1.9      | 7.2  | 18.4                   | 0.5978 | 2.4741  | 0.0038 |
| Claw 2-3 heights               |    |       |   |      |      |   |      |      |      |     |          |      |                        |        |         |        |
| External primary branch        | 30 | 8.1   | – | 11.7 | 23.6 | – | 31.6 | 10.2 | 26.8 | 0.9 | 2.1      | 10.3 | 26.3                   | 0.5920 | 4.6595  | 0.0997 |
| External secondary branch      | 30 | 6.4   | – | 9.8  | 17.3 | – | 23.3 | 7.6  | 20.0 | 0.7 | 1.9      | 7.9  | 20.1                   | 0.4927 | 3.9120  | 0.0001 |
| Claw 4 lengths                 |    |       |   |      |      |   |      |      |      |     |          |      |                        |        |         |        |
| Posterior primary branch       | 30 | 8.8   | – | 13.8 | 27.4 | – | 37.4 | 12.1 | 31.5 | 1.4 | 2.3      | 12.4 | 31.5                   | 0.7172 | 4.2409  | 0.2308 |
| Posterior secondary branch     | 30 | 6.4   | – | 11.1 | 19.2 | – | 28.1 | 8.8  | 23.1 | 1.2 | 2.3      | 8.2  | 20.9                   | 0.7742 | 2.9594  | 0.2376 |
