# Supplementary material for: Resistance to Extreme Stresses by a Newly Discovered Japanese Tardigrade Species, Macrobiotus kyoukenus (Eutardigrada, Macrobiotidae)
Source: MDPI journal article supplement (doi:10.3390/insects13070634), 2022-07-15
Supplement: s1 [file s1]

**Table S2.** Macrobitoidea sequences from GenBank utilised for comparison.

| Species                                         | GenBank Accession Number |              |          |          |
|-------------------------------------------------|--------------------------|--------------|----------|----------|
|                                                 | 18S                      | 28S          | ITS-2    | cox1     |
| <i>Ramazzottius varieornatus</i>                | BDGG01000030             | BDGG01000030 |          |          |
| <i>Macrobiotus hufelandi</i> Greenland          | GQ849024                 | GQ849047     |          |          |
| <i>Macrobiotus vladimiri</i> Spain              | FJ435738                 | FJ435754     |          |          |
| <i>Macrobiotus vladimiri</i> Spain              | FJ435739                 | FJ435755     |          |          |
| <i>Macrobiotus vladimiri</i> Spain              | FJ435740                 | FJ435751     |          |          |
| <i>Macrobiotus vladimiri</i> Finland            | MN888375                 | MN888360     |          |          |
| <i>Macrobiotus</i> cf. <i>nelsonae</i> USA      | HQ604965                 |              |          |          |
| <i>Macrobiotus</i> cf. <i>nelsonae</i> USA      | HQ604966                 |              |          |          |
| <i>Macrobiotus</i> gr. <i>sapiens</i> Italy     | HQ604971                 |              |          |          |
| <i>Macrobiotus sapiens</i> Croatia              |                          |              | GQ403680 |          |
| <i>Macrobiotus</i> cf. <i>joannae</i> Italy     | HQ604974                 |              |          |          |
| <i>Macrobiotus</i> cf. <i>joannae</i> Italy     | HQ604975                 |              |          |          |
| <i>Macrobiotus macrocalix</i> Italy             | HQ604976                 |              |          |          |
| <i>Macrobiotus polonicus</i> Poland             | HM187580                 |              |          |          |
| <i>Macrobiotus polonicus</i> Austria            | MN888369                 | MN888355     |          |          |
| <i>Macrobiotus polonicus</i> Slovakia           | MN888370                 | MN888356     |          |          |
| <i>Macrobiotus</i> aff. <i>polonicus</i> Sweden | MW588026                 | MW588032     |          |          |
| <i>Macrobiotus</i> aff. <i>polonicus</i> Sweden | MW588027                 | MW588033     |          |          |
| <i>Macrobiotus annewintersae</i> USA            | MW588024                 | MW588030     |          |          |
| <i>Macrobiotus annewintersae</i> USA            | MW588025                 | MW588031     |          |          |
| <i>Macrobiotus engbergi</i> Greenland           | MN443039                 | MN443034     |          |          |
| <i>Macrobiotus caelestis</i> Kyrgyzstan         | MK737073                 | MK737071     |          |          |
| <i>Macrobiotus pseudopallarii</i> Montenegro    | MN888365                 | MN888351     |          |          |
| <i>Macrobiotus pseudopallarii</i> Montenegro    | MT809065                 | MT809077     |          |          |
| <i>Macrobiotus pseudopallarii</i> Montenegro    | MT809066                 | MT809078     |          |          |
| <i>Macrobiotus pseudopallarii</i> Montenegro    | MT809067                 | MT809079     |          |          |
| <i>Macrobiotus pseudopallarii</i> Montenegro    | MT809068                 | MT809080     |          |          |
| <i>Macrobiotus pallarii</i> Italy               | MT809069                 | MT809081     |          |          |
| <i>Macrobiotus pallarii</i> Italy               | MT809070                 | MT809082     |          |          |
| <i>Macrobiotus pallarii</i> Italy               | MT809071                 | MT809083     |          |          |
| <i>Macrobiotus paulinae</i> Kenya               | KT935502                 | KT935501     | KT935500 | KT951668 |
| <i>Macrobiotus polyipiformis</i> Ecuador        | KX810008                 | KX810009     | KX810010 | KX810011 |
| <i>Macrobiotus polyipiformis</i> Ecuador        |                          |              |          | KX810012 |
| <i>Macrobiotus kristenseni</i> Argentina        | KC193577                 |              |          | KC193572 |
| <i>Macrobiotus kristenseni</i> Argentina        |                          |              |          | KC193573 |
| <i>Macrobiotus kristenseni</i> Argentina        |                          |              |          | KC193574 |
| <i>Macrobiotus kristenseni</i> Argentina        |                          |              |          | KC193575 |
| <i>Macrobiotus kristenseni</i> Argentina        |                          |              |          | KC193576 |
| <i>Macrobiotus scoticus</i> Scotland            | KY797265                 | KY797266     | KY797268 | KY797267 |
| <i>Macrobiotus shonaicus</i> Japan              | MG757132                 | MG757133     | MG757134 | MG757136 |
| <i>Macrobiotus shonaicus</i> Japan              |                          |              | MG757135 | MG757137 |
| <i>Macrobiotus shonaicus</i> Japan              |                          |              | LC431591 | LC431582 |
| <i>Macrobiotus shonaicus</i> Japan              |                          |              | LC431592 | LC431583 |
| <i>Macrobiotus shonaicus</i> Japan              |                          |              | LC431593 | LC431584 |
| <i>Macrobiotus shonaicus</i> Japan              |                          |              | LC431594 | LC431585 |
| <i>Macrobiotus shonaicus</i> Japan              |                          |              | LC431595 | LC431586 |
| <i>Macrobiotus shonaicus</i> Japan              |                          |              | LC431596 | LC431587 |
| <i>Macrobiotus shonaicus</i> Japan              |                          |              | LC431597 | LC431588 |
| <i>Macrobiotus shonaicus</i> Japan              |                          |              | LC431598 | LC431589 |
| <i>Macrobiotus shonaicus</i> Japan              |                          |              | LC431599 | LC431590 |

|                                               |               |          |          |          |          |
|-----------------------------------------------|---------------|----------|----------|----------|----------|
| <i>Macrobotus hanna</i>                       | Poland        | MH063922 | MH063924 |          |          |
| <i>Macrobotus papei</i>                       | Tanzania      | MH063881 | MH063880 | MH063921 | MH057763 |
| <i>Macrobotus canarius</i>                    | Spain         | MH063925 | MH063934 |          |          |
| <i>Macrobotus noongaris</i>                   | Australia     | MK737069 | MK737063 | MK737065 | MK737919 |
| <i>Macrobotus noongaris</i>                   | Australia     |          |          | MK737066 |          |
| <i>Macrobotus kamilae</i>                     | India         | MK737070 | MK737064 | MK737067 | MK737920 |
| <i>Macrobotus kamilae</i>                     | India         |          |          |          | MK737920 |
| <i>Macrobotus crustulus</i>                   | French Guiana | MT261912 | MT261903 |          |          |
| <i>Macrobotus basiat</i>                      | USA           | MT498094 | MT488397 |          |          |
| <i>Macrobotus sottilei</i>                    | Poland        | MW247178 | MW247175 | MW247179 | MW246133 |
| <i>Macrobotus glebkai</i>                     | Ukraine       | MW247177 | MW247176 |          |          |
| <i>Macrobotus margoae</i>                     | USA           | MN888368 | MN888354 |          |          |
| <i>Macrobotus margoae</i>                     | USA           | MT809072 | MT809084 |          |          |
| <i>Macrobotus margoae</i>                     | USA           | MT809073 | MT809085 |          |          |
| <i>Macrobotus ripperi</i>                     | Poland        | MN888367 | MN888353 |          |          |
| <i>Macrobotus ripperi</i>                     | Poland        | MT809074 | MT809086 |          |          |
| <i>Macrobotus ripperi</i>                     | Finland       | MN888366 | MN888352 |          |          |
| <i>Macrobotus ripperi</i>                     | Finland       | MT809075 | MT809088 |          |          |
| <i>Macrobotus ripperi</i>                     | Finland       | MT809076 | MT809089 |          |          |
| <i>Macrobotus rybaki</i>                      | Greece        | MW588029 | MW588034 |          |          |
| <i>Macrobotus rybaki</i>                      | Greece        | MW588028 | MW588035 |          |          |
| <i>Macrobotus wandae</i>                      | Nepal         | MN435109 | MN435114 |          |          |
| <i>Macrobotus wandae</i>                      | Nepal         | MN435110 | MN435118 |          |          |
| <i>Macrobotus wandae</i>                      | Nepal         | MN435111 | MN435119 |          |          |
| <i>Macrobotus wandae</i>                      | Nepal         | MN435112 | MN435116 |          |          |
| <i>Macrobotus wandae</i>                      | Nepal         | MN435113 | MN435117 |          |          |
| <i>Macrobotus sandrae</i>                     | Germany       | MW695445 |          |          |          |
| <i>Macrobotus sandrae</i>                     | Germany       | MW695446 |          |          |          |
| <i>Macrobotus azzunae</i>                     | Tunisia       | MW695447 | MW695450 |          |          |
| <i>Macrobotus azzunae</i>                     | Tunisia       | MW695448 | MW695451 |          |          |
| <i>Macrobotus azzunae</i>                     | Tunisia       | MW695449 | MW695452 |          |          |
| <i>Macrobotus birendrai</i>                   | Canada        | MW680641 |          |          |          |
| <i>Macrobotus ariekammensis groenlandicus</i> | Greenland     | MZ463662 |          |          |          |
| <i>Macrobotus ariekammensis groenlandicus</i> | Greenland     | MZ463663 |          |          |          |
| <i>Macrobotus ariekammensis groenlandicus</i> | Greenland     | MZ463664 |          |          |          |
| <i>Macrobotus ariekammensis ariekammensis</i> | Norway        | MZ463668 |          |          |          |
| <i>Macrobotus ariekammensis ariekammensis</i> | Norway        | MZ463669 |          |          |          |
| <i>Macrobotus ariekammensis ariekammensis</i> | Norway        | MZ463670 |          |          |          |
| <i>Macrobotus kirghizicus</i>                 | Kyrgyzstan    | MZ463665 |          |          |          |
| <i>Macrobotus kirghizicus</i>                 | Kyrgyzstan    | MZ463666 |          |          |          |
| <i>Macrobotus kirghizicus</i>                 | Kyrgyzstan    | MZ463667 |          |          |          |
| <i>Macrobotus</i> sp.                         |               | EF632478 |          |          |          |
| <i>Macrobotus</i> sp.                         |               | EF632479 |          |          |          |
| <i>Macrobotus</i> sp.                         |               | EF632480 |          |          |          |
| <i>Macrobotus</i> gr. <i>hufelandi</i>        |               | EF632481 |          |          |          |
| <i>Macrobotus</i> gr. <i>hufelandi</i>        |               | EF632482 |          |          |          |
| <i>Macrobotus</i> gr. <i>hufelandi</i>        |               | EF632483 |          |          |          |
| <i>Macrobotus</i> gr. <i>hufelandi</i>        |               | EF632484 |          |          |          |

|                                                  |          |          |
|--------------------------------------------------|----------|----------|
| <i>Macrobiotus</i> gr. <i>hufelandi</i>          | EF632485 |          |
| <i>Macrobiotus</i> gr. <i>hufelandi</i>          | EF632486 |          |
| <i>Macrobiotus</i> gr. <i>hufelandi</i>          | EF632487 |          |
| <i>Macrobiotus</i> gr. <i>hufelandi</i>          | EF632488 |          |
| <i>Macrobiotus</i> gr. <i>hufelandi</i>          | EF632489 |          |
| <i>Macrobiotus</i> gr. <i>hufelandi</i>          | EF632490 |          |
| <i>Macrobiotus</i> gr. <i>hufelandi</i>          | EF632491 |          |
| <i>Macrobiotus</i> sp.                           | EU266935 |          |
| <i>Macrobiotus</i> sp.                           | EU266936 |          |
| <i>Macrobiotus</i> sp.                           | EU266937 |          |
| <i>Macrobiotus</i> sp.                           | EU266938 |          |
| <i>Macrobiotus</i> sp.                           | U49912   |          |
| <i>Macrobiotus</i> sp. Austria                   | MN927135 |          |
|                                                  |          |          |
| <i>Xerobiotus pseudohufelandi</i> Italy          | HQ604989 |          |
| <i>Xerobiotus pseudohufelandi</i> Italy          | HQ604990 |          |
| <i>Xerobiotus gretae</i> Sweden                  | MW588434 | MW588438 |
| <i>Xerobiotus gretae</i> Sweden                  | MW588435 | MW588439 |
| <i>Xerobiotus gretae</i> Sweden                  | MW588436 | MW588440 |
| <i>Xerobiotus gretae</i> Sweden                  | MW588437 | MW588441 |
| <i>Xerobiotus</i> sp. Poland                     | MN888373 | MN888358 |
| <i>Xerobiotus</i> sp. South Africa               | MN888374 | MN888359 |
|                                                  |          |          |
| <i>Mesobiotus hilariae</i> Antarctica            | KT226068 |          |
| <i>Mesobiotus hilariae</i> Antarctica            | KT226069 |          |
| <i>Mesobiotus hilariae</i> Antarctica            | KT226070 | KT226079 |
| <i>Mesobiotus hilariae</i> Antarctica            | KT226071 |          |
| <i>Mesobiotus</i> cf. <i>mottai</i> Antarctica   | KT226072 | KT226079 |
| <i>Mesobiotus polaris</i> Antarctica             | KT226075 |          |
| <i>Mesobiotus polaris</i> Antarctica             | KT226076 |          |
| <i>Mesobiotus polaris</i> Antarctica             | KT226077 | KT226087 |
| <i>Mesobiotus polaris</i> Antarctica             | KT226078 |          |
| <i>Mesobiotus</i> gr. <i>harmsworthi</i> Italy   | HQ604967 | HQ604981 |
| <i>Mesobiotus</i> gr. <i>harmsworthi</i> Italy   | HQ604968 | HQ604982 |
| <i>Mesobiotus</i> gr. <i>harmsworthi</i> Italy   | HQ604969 | HQ604985 |
| <i>Mesobiotus</i> gr. <i>harmsworthi</i> Italy   | HQ604970 | HQ604986 |
| <i>Mesobiotus</i> gr. <i>harmsworthi</i> Italy   | KT226073 | KT226083 |
| <i>Mesobiotus</i> gr. <i>harmsworthi</i> Italy   | KT226074 | KT226084 |
| <i>Mesobiotus furciger</i> Antarctica            | EU266927 |          |
| <i>Mesobiotus furciger</i> Antarctica            | EU266928 |          |
| <i>Mesobiotus furciger</i> Antarctica            | EU266929 |          |
| <i>Mesobiotus</i> sp. Antarctica                 | EU266926 |          |
| <i>Mesobiotus</i> cf. <i>furciger</i>            | EF632476 |          |
| <i>Mesobiotus</i> cf. <i>furciger</i>            | EF632475 |          |
| <i>Mesobiotus</i> cf. <i>furciger</i>            | EF632474 |          |
| <i>Mesobiotus</i> cf. <i>furciger</i>            | EF632473 |          |
| <i>Mesobiotus</i> cf. <i>furciger</i>            | EF632472 |          |
| <i>Mesobiotus</i> cf. <i>furciger</i>            | EF632471 |          |
| <i>Mesobiotus</i> cf. <i>furciger</i>            | EF632470 |          |
| <i>Mesobiotus</i> cf. <i>furciger</i>            | EF632469 |          |
| <i>Mesobiotus</i> sp. Antarctica                 | JX296290 |          |
| <i>Mesobiotus</i> cf. <i>furciger</i> Antarctica | JX296285 |          |
| <i>Mesobiotus</i> cf. <i>furciger</i> Antarctica | JX296284 |          |
| <i>Mesobiotus</i> cf. <i>furciger</i> Antarctica | JX296283 |          |

|                                             |          |          |
|---------------------------------------------|----------|----------|
| <i>Mesobiotus cf. furciger</i> Antarctica   | JX296282 |          |
| <i>Mesobiotus cf. furciger</i> Antarctica   | JX296281 |          |
| <i>Mesobiotus cf. furciger</i> Antarctica   | JX296280 |          |
| <i>Mesobiotus cf. furciger</i> Antarctica   | JX296279 |          |
| <i>Mesobiotus cf. furciger</i> Antarctica   | JX296278 |          |
| <i>Mesobiotus cf. furciger</i> Antarctica   | JX296277 |          |
| <i>Mesobiotus cf. furciger</i> Antarctica   | JX296332 |          |
| <i>Mesobiotus</i> sp.                       | JX296334 |          |
| <i>Mesobiotus cf. furciger</i> Antarctica   | JX296329 |          |
| <i>Mesobiotus cf. furciger</i> Antarctica   | JX296328 |          |
| <i>Mesobiotus cf. furciger</i> Antarctica   | JX296327 |          |
| <i>Mesobiotus cf. furciger</i> Antarctica   | JX296326 |          |
| <i>Mesobiotus cf. furciger</i> Antarctica   | JX296324 |          |
| <i>Mesobiotus cf. furciger</i> Antarctica   | JX296323 |          |
| <i>Mesobiotus cf. furciger</i> Antarctica   | JX296321 |          |
| <i>Mesobiotus cf. furciger</i> Antarctica   | JX296317 |          |
| <i>Mesobiotus cf. furciger</i> Antarctica   | JX296316 |          |
| <i>Mesobiotus cf. furciger</i> Antarctica   | JX296315 |          |
| <i>Mesobiotus cf. furciger</i> Antarctica   | JX296314 |          |
| <i>Mesobiotus cf. furciger</i> Antarctica   | JX296312 |          |
| <i>Mesobiotus cf. furciger</i> Antarctica   | JX296311 |          |
| <i>Mesobiotus cf. furciger</i> Antarctica   | JX296309 |          |
| <i>Mesobiotus cf. furciger</i> Antarctica   | JX296308 |          |
| <i>Mesobiotus cf. furciger</i> Antarctica   | JX296307 |          |
| <i>Mesobiotus cf. furciger</i> Antarctica   | JX296306 |          |
| <i>Mesobiotus cf. furciger</i> Antarctica   | JX296305 |          |
| <i>Mesobiotus cf. furciger</i> Antarctica   | JX296303 |          |
| <i>Mesobiotus cf. furciger</i> Antarctica   | JX296302 |          |
| <i>Mesobiotus cf. furciger</i> Antarctica   | JX296300 |          |
| <i>Mesobiotus cf. furciger</i> Antarctica   | JX296299 |          |
| <i>Mesobiotus cf. furciger</i> Antarctica   | JX296298 |          |
| <i>Mesobiotus cf. furciger</i> Antarctica   | JX296297 |          |
| <i>Mesobiotus cf. furciger</i> Antarctica   | JX296296 |          |
| <i>Mesobiotus cf. furciger</i> Antarctica   | JX296295 |          |
| <i>Mesobiotus cf. furciger</i> Antarctica   | JX296292 |          |
| <i>Mesobiotus cf. furciger</i> Antarctica   | JX296291 |          |
| <i>Mesobiotus cf. furciger</i> Antarctica   | JX296289 |          |
| <i>Mesobiotus cf. furciger</i> Antarctica   | JX296288 |          |
| <i>Mesobiotus cf. furciger</i> Antarctica   | JX296287 |          |
| <i>Mesobiotus cf. furciger</i> Antarctica   | JX296338 |          |
| <i>Mesobiotus cf. furciger</i> Antarctica   | JX296337 |          |
| <i>Mesobiotus cf. furciger</i> Antarctica   | JX296336 |          |
| <i>Mesobiotus cf. furciger</i> Antarctica   | JX296335 |          |
| <i>Mesobiotus philippinicus</i> Philippines | KX129793 | KX129794 |
| <i>Mesobiotus insanis</i> Philippines       | MF441488 | MF441489 |
| <i>Mesobiotus ethiopicus</i> Ethiopia       | MF678793 | MF678792 |
| <i>Mesobiotus romani</i> Ecuador            | MH197158 | MH197151 |
| <i>Mesobiotus fiedleri</i> Madagascar       | MH681585 | MH681593 |
| <i>Mesobiotus datanlanicus</i> Vietnam      | MK584659 | MK584658 |
| <i>Mesobiotus dilimanensis</i> Philippines  | MN257048 | MN257049 |
| <i>Mesobiotus cf. barabanovi</i> Kyrgyzstan | MN310392 | MN310388 |
| <i>Mesobiotus anastasiae</i> South Africa   | MT903468 | MT903612 |
| <i>Mesobiotus imperialis</i> Vietnam        | OL257854 |          |
| <i>Mesobiotus imperialis</i> Vietnam        | OL257855 |          |

|                                                |          |          |
|------------------------------------------------|----------|----------|
| <i>Mesobiotus marmoreus</i> Vietnam            | OL257856 |          |
| <i>Mesobiotus marmoreus</i> Vietnam            | OL257857 |          |
| <i>Mesobiotus marmoreus</i> Vietnam            | OL257858 |          |
| <i>Mesobiotus furciger</i> Antarctica          | MW751933 |          |
| <i>Mesobiotus furciger</i> Antarctica          | MW751934 |          |
| <i>Mesobiotus furciger</i> Antarctica          | MW751935 |          |
| <i>Mesobiotus furciger</i> Antarctica          | MW751936 |          |
| <i>Mesobiotus furciger</i> Antarctica          | MW751937 |          |
| <i>Mesobiotus furciger</i> Antarctica          | MW751938 |          |
| <i>Mesobiotus furciger</i> Antarctica          | MW751939 |          |
| <i>Mesobiotus</i> sp. stellate egg Antarctica  | MW751940 |          |
| <i>Mesobiotus</i> sp. stellate egg Antarctica  | MW751941 |          |
| <i>Mesobiotus</i> sp. stellate egg Antarctica  | MW751942 |          |
| <i>Mesobiotus furciger</i> Antarctica          | MW751943 |          |
| <i>Mesobiotus furciger</i> Antarctica          | MW751944 |          |
| <i>Mesobiotus furciger</i> Antarctica          | MW751945 |          |
| <i>Mesobiotus furciger</i> Antarctica          | MW751946 |          |
| <i>Mesobiotus furciger</i> Antarctica          | MW751947 |          |
| <i>Mesobiotus furciger</i> Antarctica          | MW751948 |          |
| <i>Mesobiotus furciger</i> Antarctica          | MW751949 |          |
| <i>Mesobiotus furciger</i> Antarctica          | MW751950 |          |
| <i>Mesobiotus furciger</i> Antarctica          | MW751951 |          |
| <i>Mesobiotus furciger</i> Antarctica          | MW751952 |          |
| <i>Mesobiotus furciger</i> Antarctica          | MW751953 |          |
| <i>Mesobiotus furciger</i> Antarctica          | MW751954 |          |
| <i>Mesobiotus furciger</i> Antarctica          | MW751955 |          |
| <i>Mesobiotus furciger</i> Antarctica          | MW751956 |          |
| <i>Mesobiotus furciger</i> Antarctica          | MW751957 |          |
| <i>Mesobiotus furciger</i> Antarctica          | MW751958 |          |
| <i>Mesobiotus furciger</i> Antarctica          | MW751959 |          |
| <i>Mesobiotus furciger</i> Antarctica          | MW751960 |          |
| <i>Mesobiotus furciger</i> Antarctica          | MW751961 |          |
| <i>Mesobiotus furciger</i> Antarctica          | MW751962 |          |
| <i>Mesobiotus furciger</i> Antarctica          | MW751963 |          |
| <i>Mesobiotus furciger</i> Antarctica          | MW751964 |          |
| <i>Mesobiotus furciger</i> Antarctica          | MW751965 |          |
| <i>Mesobiotus furciger</i> Antarctica          | MW751966 |          |
| <i>Mesobiotus furciger</i> Antarctica          | MW751967 |          |
| <i>Mesobiotus furciger</i> Antarctica          | MW751968 |          |
| <i>Mesobiotus furciger</i> Antarctica          | MW751969 |          |
|                                                |          |          |
| <i>Minibiotus furcatus</i> Spain               | FJ435745 | FJ435759 |
| <i>Minibiotus furcatus</i> Spain               | FJ435746 | FJ435760 |
| <i>Minibiotus furcatus</i> Spain               | FJ435747 | FJ435758 |
| <i>Minibiotus furcatus</i> Italy               | HQ604977 |          |
| <i>Minibiotus furcatus</i> Italy               | HQ604978 |          |
| <i>Minibiotus gumersindoi</i> Spain            | FJ435748 | FJ435761 |
| <i>Minibiotus</i> gr. <i>intermedius</i> Italy | HQ604979 |          |
| <i>Minibiotus</i> gr. <i>intermedius</i> Italy | HQ604980 |          |
| <i>Minibiotus ioculator</i> South Africa       | MT023998 | MT024041 |
| <i>Minibiotus pentannulatus</i> Tanzania       | MT023999 | MT024042 |
| <i>Minibiotus</i> sp.                          | EU266932 |          |
| <i>Minibiotus</i> sp.                          | EU266933 |          |
| <i>Minibiotus</i> sp.                          | EU266934 |          |

|                                                      |          |          |          |
|------------------------------------------------------|----------|----------|----------|
| <i>Paramacrobilotus areolatus</i> Norway             | MH664931 | MH664948 |          |
| <i>Paramacrobilotus areolatus</i> Croatia            | DQ839602 |          |          |
| <i>Paramacrobilotus tonollii</i> USA                 | DQ839605 |          |          |
| <i>Paramacrobilotus tonollii</i> USA                 | MH664946 | MH664963 |          |
| <i>Paramacrobilotus lachowskiae</i> Colombia         | MF568532 | MF568533 |          |
| <i>Paramacrobilotus</i> gr. <i>richtersi</i> Germany | DQ839603 |          |          |
| <i>Paramacrobilotus kenianus</i> Kenya               | EU038081 |          |          |
| <i>Paramacrobilotus kenianus</i> Kenya               | EU038080 |          |          |
| <i>Paramacrobilotus fairbanksi</i> USA               | EU038078 | GQ403674 |          |
| <i>Paramacrobilotus</i> gr. <i>richtersi</i> Spain   | FJ435744 |          |          |
| <i>Paramacrobilotus</i> gr. <i>richtersi</i> Spain   | FJ435743 | FJ435757 |          |
| <i>Paramacrobilotus richtersi</i> Ireland            | HQ604986 |          | MK040992 |
| <i>Paramacrobilotus richtersi</i> Ireland            | MK041023 |          |          |
| <i>Paramacrobilotus spatialis</i> Italy              | HQ604985 |          |          |
| <i>Paramacrobilotus spatialis</i> Italy              | MK041024 |          |          |
| <i>Paramacrobilotus spatialis</i> Italy              | MK041025 |          |          |
| <i>Paramacrobilotus</i> aff. <i>spatialis</i> Ca1    | MK041026 |          |          |
| Guidetti et al. 2019 Italy                           |          |          |          |
| <i>Paramacrobilotus fairbanksi</i> Italy             | MK041027 |          |          |
| <i>Paramacrobilotus fairbanksi</i> Italy             | MK041028 |          |          |
| <i>Paramacrobilotus fairbanksi</i> Italy             | MK041029 |          |          |
| <i>Paramacrobilotus fairbanksi</i> Poland            | MH664941 | MH664950 |          |
| <i>Paramacrobilotus fairbanksi</i> Poland            | MH664942 | MH664959 |          |
| <i>Paramacrobilotus fairbanksi</i> Antarctica        | MN960302 | MN960306 |          |
| <i>Paramacrobilotus fairbanksi</i> Antarctica        | MN960303 | MN960307 |          |
| <i>Paramacrobilotus fairbanksi</i> Antarctica        | MN960304 |          |          |
| <i>Paramacrobilotus depressus</i> Italy              | MK041030 |          |          |
| <i>Paramacrobilotus celsus</i> Italy                 | MK041031 |          |          |
| <i>Paramacrobilotus arduus</i> Italy                 | MK041032 |          |          |
| <i>Paramacrobilotus filipi</i> Malaysia              | MT261913 | MT261904 |          |
| <i>Paramacrobilotus experimentalis</i>               | MN073467 | MN073466 |          |
| Madagascar                                           |          |          |          |
| <i>Paramacrobilotus experimentalis</i>               | MN073468 | MN073465 |          |
| Madagascar                                           |          |          |          |
| <i>Paramacrobilotus</i> sp. Australia                | MH664932 | MH664949 |          |
| <i>Paramacrobilotus</i> sp. Tanzania                 | MH664933 | MH664951 |          |
| <i>Paramacrobilotus</i> sp. Brazil                   | MH664934 | MH664952 |          |
| <i>Paramacrobilotus</i> sp. France                   | MH664935 | MH664953 |          |
| <i>Paramacrobilotus</i> sp. Hungary                  | MH664936 | MH664954 |          |
| <i>Paramacrobilotus</i> sp. Italy                    | MH664937 | MH664955 |          |
| <i>Paramacrobilotus</i> sp. Madagascar               | MH664938 | MH664956 |          |
| <i>Paramacrobilotus</i> sp. Norway                   | MH664939 | MH664957 |          |
| <i>Paramacrobilotus</i> sp. New Zealand              | MH664940 | MH664958 |          |
| <i>Paramacrobilotus</i> sp. Portugal                 | MH664943 | MH664960 |          |
| <i>Paramacrobilotus</i> sp. Portugal                 | MH664944 | MH664961 |          |
| <i>Paramacrobilotus</i> sp. Tunisia                  | MH664945 | MH664962 |          |
| <i>Paramacrobilotus</i> sp.                          | EF632477 |          |          |
| <i>Paramacrobilotus</i> sp.                          | X81442   |          |          |
| <i>Sisubiotus spectabilis</i> Finland                | MN888371 | MN888357 |          |
| <i>Sisubiotus spectabilis</i> Norway                 | MN888372 | MN888364 |          |
| <i>Tenuibiotus voronkovi</i> Arctic                  | KX810045 | KX810049 |          |

|                                                   |          |          |
|---------------------------------------------------|----------|----------|
| <i>Tenuibiotus zandrae</i> Greenland              | MN443040 | MN443035 |
| <i>Tenuibiotus</i> cf. <i>ciprianoi</i> Spain     | MN888376 | MN888361 |
| <i>Tenuibiotus danilovi</i> Kyrgyzstan            | MN888377 | MN888362 |
| <i>Tenuibiotus tenuiformis</i> Kyrgyzstan         | MN888378 | MN888363 |
|                                                   |          |          |
| <i>Adorybiotus granulatus</i> Norway              | HQ604961 |          |
| <i>Adorybiotus granulatus</i> Norway              | HQ604962 |          |
| <i>Adorybiotus</i> cf. <i>granulatus</i> Japan    | MT812475 | MT812464 |
|                                                   |          |          |
| <i>Crenubiotus</i> sp. Scotland                   | MT812473 |          |
| <i>Crenubiotus crenulatus</i> Norway              | MT812474 |          |
| <i>Crenubiotus</i> sp. Greenland                  | OM179850 |          |
| <i>Crenubiotus</i> sp. Greenland                  | OM179851 |          |
| <i>Crenubiotus ruhesteni</i> Germany              | MW074384 | MW074390 |
| <i>Crenubiotus ruhesteni</i> Germany              | MW074385 | MW074391 |
| <i>Crenubiotus ruhesteni</i> Germany              | MW074386 | MW074392 |
| <i>Crenubiotus ruhesteni</i> Germany              | MW074387 | MW074393 |
| <i>Crenubiotus ruhesteni</i> Germany              | MW074388 | MW074394 |
| <i>Crenubiotus ruhesteni</i> Germany              | MW074389 | MW074395 |
|                                                   |          |          |
| <i>Diaforobiotus islandicus</i> Norway            | HQ604972 | KT778704 |
| <i>Diaforobiotus islandicus</i> Norway            | HQ604973 | KT778705 |
| <i>Diaforobiotus islandicus</i> Iceland           | MT812470 | MT812462 |
| <i>Diaforobiotus</i> sp. Norway                   | MT812471 | MT812463 |
| <i>Diaforobiotus</i> sp. Indonesia                | MT812472 | MT812464 |
| <i>Diaforobiotus hyperonyx</i> Italy              | OM179852 |          |
| <i>Diaforobiotus hyperonyx</i> Italy              | OM179853 |          |
| <i>Diaforobiotus hyperonyx</i> Italy              | OM179854 |          |
| <i>Diaforobiotus hyperonyx</i> Italy              | OM179855 |          |
|                                                   |          |          |
| <i>Richtersius coronifer</i> Norway               | MH681760 | MH681757 |
| <i>Richtersius</i> cf. <i>coronifer</i> Greenland | KT778712 | KT778702 |
| <i>Richtersius</i> cf. <i>coronifer</i> Greenland | KT778713 | KT778703 |
| <i>Richtersius</i> cf. <i>coronifer</i> Italy     | HQ604987 | HQ604695 |
| <i>Richtersius</i> cf. <i>coronifer</i> Italy     | HQ604988 | HQ604696 |
| <i>Richtersius</i> cf. <i>coronifer</i> Italy     | KT778706 | KT778697 |
| <i>Richtersius</i> cf. <i>coronifer</i> Italy     | KT778707 | KT778698 |
| <i>Richtersius</i> cf. <i>coronifer</i> Mongolia  | KT778708 | KT778699 |
| <i>Richtersius</i> cf. <i>coronifer</i> Mongolia  | KT778709 | KT778700 |
| <i>Richtersius</i> cf. <i>coronifer</i> Mongolia  | KT778710 | KT778701 |
| <i>Richtersius</i> cf. <i>coronifer</i> Italy     | KT778711 |          |
| <i>Richtersius</i> aff. <i>coronifer</i> Italy    | MH681761 | MH681758 |
| <i>Richtersius</i> aff. <i>coronifer</i> Poland   | MH681762 | MH681759 |
| <i>Richtersius tertius</i> Greece                 | MK211386 | MK211384 |
| <i>Richtersius</i> aff. <i>coronifer</i> Italy    | MK211387 | MK211385 |
| <i>Richtersius ziemowiti</i> Nepal                | MT241891 | MT241895 |
|                                                   |          |          |
| <i>Murrayon pullari</i> Italy                     | HQ604983 |          |
| <i>Murrayon pullari</i> Italy                     | HQ604984 |          |
| <i>Murrayon</i> cf. <i>pullari</i> Italy          | MT812477 | MT812465 |
| <i>Murrayon pullari</i> Greenland                 | GQ849026 | MH079499 |
| <i>Murrayon dianeae</i> Italy                     | HQ604981 |          |
| <i>Murrayon dianeae</i> Italy                     | HQ604982 |          |
| <i>Murrayon</i> cf. <i>dianeae</i> Spain          | FJ435737 | FJ435762 |

|                                               |          |          |
|-----------------------------------------------|----------|----------|
| <i>Dactylobiotus ovimutans</i> Antarctica     | MT136805 | MT136807 |
| <i>Dactylobiotus ambiguus</i>                 | GQ925676 | MH079500 |
| <i>Dactylobiotus ambiguus</i>                 | GQ925677 |          |
| <i>Dactylobiotus ambiguus</i>                 | GQ925680 |          |
| <i>Dactylobiotus ambiguus</i>                 | GQ925681 |          |
| <i>Dactylobiotus octavi</i> Greenland         | GQ849025 | GQ849049 |
| <i>Dactylobiotus selenicus</i> Finland        | MT812476 | MT812466 |
| <i>Dactylobiotus parthenogeneticus</i> Poland | MT373695 | MT373701 |
| <i>Dactylobiotus parthenogeneticus</i> France | MT373694 | MT373700 |
| <i>Dactylobiotus parthenogeneticus</i> UK     | MT373693 | MT373699 |
