# Supplementary material for: Resistance to Extreme Stresses by a Newly Discovered Japanese Tardigrade Species, Macrobiotus kyoukenus (Eutardigrada, Macrobiotidae)
Source: MDPI journal article supplement (doi:10.3390/insects13070634), 2022-07-15
Supplement: s1 [file s1]

**Table S4.** ITS-2gene genetic distances (p-distance) computed among *Macrobiotus* specimens pertaining to the subclade C (*sensu* [29]). The analysis was carried out on a 530 bp dataset.

|    |                                                                    | 1     | 2     | 3     | 4     | 5     | 6     | 7     | 8     | 9     | 10    | 11    | 12    | 13    | 14    | 15    | 16    | 17    | 18    | 19    | 20    | 21    | 22    | 23    | 24    | 25    | 26    |
|----|--------------------------------------------------------------------|-------|-------|-------|-------|-------|-------|-------|-------|-------|-------|-------|-------|-------|-------|-------|-------|-------|-------|-------|-------|-------|-------|-------|-------|-------|-------|
| 1  | GQ403674 <i>Paramacrobiotus fairbanksi</i> Alaska USA              |       |       |       |       |       |       |       |       |       |       |       |       |       |       |       |       |       |       |       |       |       |       |       |       |       |       |
| 2  | GQ403680 <i>Macrobiotus sapiens</i> Croatia                        | 0.461 |       |       |       |       |       |       |       |       |       |       |       |       |       |       |       |       |       |       |       |       |       |       |       |       |       |
| 3  | MG757134 <i>Macrobiotus shonaicus</i> Tsuruoka Japan               | 0.437 | 0.160 |       |       |       |       |       |       |       |       |       |       |       |       |       |       |       |       |       |       |       |       |       |       |       |       |
| 4  | MG757135 <i>Macrobiotus shonaicus</i> Tsuruoka Japan               | 0.441 | 0.160 | 0.006 |       |       |       |       |       |       |       |       |       |       |       |       |       |       |       |       |       |       |       |       |       |       |       |
| 5  | LC431591 <i>Macrobiotus</i> cf. <i>shonaicus</i> Oritsume Japan    | 0.467 | 0.170 | 0.006 | 0.012 |       |       |       |       |       |       |       |       |       |       |       |       |       |       |       |       |       |       |       |       |       |       |
| 6  | LC431592 <i>Macrobiotus</i> cf. <i>shonaicus</i> Hiyoshi Japan     | 0.460 | 0.177 | 0.009 | 0.015 | 0.011 |       |       |       |       |       |       |       |       |       |       |       |       |       |       |       |       |       |       |       |       |       |
| 7  | LC431593 <i>Macrobiotus</i> cf. <i>shonaicus</i> Kamiyoshida Japan | 0.474 | 0.173 | 0.009 | 0.003 | 0.011 | 0.013 |       |       |       |       |       |       |       |       |       |       |       |       |       |       |       |       |       |       |       |       |
| 8  | LC431594 <i>Macrobiotus</i> cf. <i>shonaicus</i> Shizuoka Japan    | 0.467 | 0.176 | 0.012 | 0.006 | 0.013 | 0.015 | 0.007 |       |       |       |       |       |       |       |       |       |       |       |       |       |       |       |       |       |       |       |
| 9  | LC431595 <i>Macrobiotus</i> cf. <i>shonaicus</i> Kyoto Japan       | 0.466 | 0.167 | 0.012 | 0.018 | 0.013 | 0.011 | 0.015 | 0.017 |       |       |       |       |       |       |       |       |       |       |       |       |       |       |       |       |       |       |
| 10 | LC431596 <i>Macrobiotus</i> cf. <i>shonaicus</i> Rokko Japan       | 0.472 | 0.170 | 0.009 | 0.015 | 0.013 | 0.011 | 0.015 | 0.017 | 0.004 |       |       |       |       |       |       |       |       |       |       |       |       |       |       |       |       |       |
| 11 | LC431597 <i>Macrobiotus</i> cf. <i>shonaicus</i> Bizan Japan       | 0.474 | 0.170 | 0.012 | 0.006 | 0.015 | 0.017 | 0.004 | 0.011 | 0.020 | 0.020 |       |       |       |       |       |       |       |       |       |       |       |       |       |       |       |       |
| 12 | LC431598 <i>Macrobiotus</i> cf. <i>shonaicus</i> Oki Japan         | 0.470 | 0.177 | 0.012 | 0.006 | 0.020 | 0.022 | 0.013 | 0.015 | 0.024 | 0.024 | 0.017 |       |       |       |       |       |       |       |       |       |       |       |       |       |       |       |
| 13 | LC431599 <i>Macrobiotus</i> cf. <i>shonaicus</i> Kagoshima Japan   | 0.463 | 0.167 | 0.006 | 0.012 | 0.009 | 0.007 | 0.011 | 0.013 | 0.009 | 0.009 | 0.015 | 0.020 |       |       |       |       |       |       |       |       |       |       |       |       |       |       |
| 14 | MH063921 <i>Macrobiotus papei</i> Tanzania                         | 0.455 | 0.086 | 0.123 | 0.120 | 0.122 | 0.122 | 0.117 | 0.119 | 0.120 | 0.117 | 0.114 | 0.120 | 0.115 |       |       |       |       |       |       |       |       |       |       |       |       |       |
| 15 | KY797268 <i>Macrobiotus scoticus</i> Scotland                      | 0.543 | 0.255 | 0.259 | 0.259 | 0.213 | 0.213 | 0.216 | 0.218 | 0.207 | 0.210 | 0.216 | 0.216 | 0.216 | 0.215 |       |       |       |       |       |       |       |       |       |       |       |       |
| 16 | KT935500 <i>Macrobiotus paulinae</i> Kenya                         | 0.497 | 0.186 | 0.164 | 0.158 | 0.135 | 0.135 | 0.128 | 0.131 | 0.128 | 0.128 | 0.128 | 0.131 | 0.128 | 0.132 | 0.228 |       |       |       |       |       |       |       |       |       |       |       |
| 17 | KX810010 <i>Macrobiotus polypiformis</i> Ecuador                   | 0.477 | 0.301 | 0.208 | 0.204 | 0.213 | 0.213 | 0.210 | 0.213 | 0.203 | 0.206 | 0.208 | 0.214 | 0.208 | 0.220 | 0.266 | 0.211 |       |       |       |       |       |       |       |       |       |       |
| 18 | MK737065 <i>Macrobiotus noongaris</i> Australia                    | 0.465 | 0.191 | 0.149 | 0.149 | 0.171 | 0.162 | 0.169 | 0.171 | 0.159 | 0.156 | 0.166 | 0.172 | 0.159 | 0.165 | 0.249 | 0.174 | 0.252 |       |       |       |       |       |       |       |       |       |
| 19 | MK737066 <i>Macrobiotus noongaris</i> Australia                    | 0.462 | 0.191 | 0.143 | 0.143 | 0.166 | 0.156 | 0.164 | 0.166 | 0.154 | 0.151 | 0.161 | 0.167 | 0.154 | 0.165 | 0.252 | 0.171 | 0.252 | 0.010 |       |       |       |       |       |       |       |       |
| 20 | MK737067 <i>Macrobiotus kamilae</i> India                          | 0.487 | 0.176 | 0.151 | 0.151 | 0.143 | 0.143 | 0.140 | 0.143 | 0.134 | 0.132 | 0.137 | 0.140 | 0.134 | 0.131 | 0.270 | 0.124 | 0.244 | 0.152 | 0.146 |       |       |       |       |       |       |       |
| 21 | MW247179 <i>Macrobiotus sottilei</i> Poland                        | 0.464 | 0.078 | 0.102 | 0.102 | 0.108 | 0.113 | 0.110 | 0.113 | 0.111 | 0.108 | 0.108 | 0.116 | 0.105 | 0.068 | 0.235 | 0.129 | 0.244 | 0.139 | 0.133 | 0.126 |       |       |       |       |       |       |
| 22 | C4313 V3 ITS2                                                      | 0.456 | 0.133 | 0.143 | 0.143 | 0.137 | 0.137 | 0.135 | 0.137 | 0.135 | 0.131 | 0.135 | 0.140 | 0.131 | 0.096 | 0.217 | 0.109 | 0.227 | 0.181 | 0.176 | 0.122 | 0.104 |       |       |       |       |       |
| 23 | C4313 US3 ITS2                                                     | 0.456 | 0.136 | 0.140 | 0.140 | 0.135 | 0.135 | 0.133 | 0.135 | 0.133 | 0.129 | 0.133 | 0.138 | 0.129 | 0.098 | 0.217 | 0.111 | 0.225 | 0.181 | 0.176 | 0.122 | 0.107 | 0.002 |       |       |       |       |
| 24 | C4313 US4 ITS2                                                     | 0.456 | 0.133 | 0.143 | 0.143 | 0.137 | 0.137 | 0.135 | 0.137 | 0.135 | 0.131 | 0.135 | 0.140 | 0.131 | 0.096 | 0.217 | 0.109 | 0.227 | 0.181 | 0.176 | 0.122 | 0.104 | 0.000 | 0.002 |       |       |       |
| 25 | C4313 US5 ITS2                                                     | 0.456 | 0.136 | 0.140 | 0.140 | 0.135 | 0.135 | 0.133 | 0.135 | 0.133 | 0.129 | 0.133 | 0.138 | 0.129 | 0.098 | 0.217 | 0.111 | 0.225 | 0.181 | 0.176 | 0.122 | 0.107 | 0.002 | 0.000 | 0.002 |       |       |
| 26 | C4313 US6 ITS2                                                     | 0.456 | 0.133 | 0.143 | 0.143 | 0.137 | 0.137 | 0.135 | 0.137 | 0.135 | 0.131 | 0.135 | 0.140 | 0.131 | 0.096 | 0.217 | 0.109 | 0.227 | 0.181 | 0.176 | 0.122 | 0.104 | 0.000 | 0.002 | 0.000 | 0.002 |       |
| 27 | C4313 US7 ITS2                                                     | 0.456 | 0.133 | 0.143 | 0.143 | 0.137 | 0.137 | 0.135 | 0.137 | 0.135 | 0.131 | 0.135 | 0.140 | 0.131 | 0.096 | 0.217 | 0.109 | 0.227 | 0.181 | 0.176 | 0.122 | 0.104 | 0.000 | 0.002 | 0.000 | 0.002 | 0.000 |
