# Supplementary material for: Resistance to Extreme Stresses by a Newly Discovered Japanese Tardigrade Species, Macrobiotus kyoukenus (Eutardigrada, Macrobiotidae)
Source: MDPI journal article supplement (doi:10.3390/insects13070634), 2022-07-15
Supplement: s1 [file s1]

**Table S3.** *cox1* gene genetic distances (p-distance) computed among *Macrobiotus* specimens pertaining to the subclade C (*sensu* [29]). The analysis was carried out on a 657 bp dataset.

|    |                                                                    | 1     | 2     | 3     | 4     | 5     | 6     | 7     | 8     | 9     | 10    | 11    | 12    | 13    | 14    | 15    | 16    | 17    | 18    | 19    | 20    | 21    | 22    | 23    | 24    | 25    | 26    | 27    | 28    | 29    | 30    | 31    |
|----|--------------------------------------------------------------------|-------|-------|-------|-------|-------|-------|-------|-------|-------|-------|-------|-------|-------|-------|-------|-------|-------|-------|-------|-------|-------|-------|-------|-------|-------|-------|-------|-------|-------|-------|-------|
| 1  | MK040992 <i>Paramacrobiotus richtersi</i>                          |       |       |       |       |       |       |       |       |       |       |       |       |       |       |       |       |       |       |       |       |       |       |       |       |       |       |       |       |       |       |       |
| 2  | MG757136 <i>Macrobiotus shonaicus</i> Tsuruoka Japan               | 0.246 |       |       |       |       |       |       |       |       |       |       |       |       |       |       |       |       |       |       |       |       |       |       |       |       |       |       |       |       |       |       |
| 3  | MG757137 <i>Macrobiotus shonaicus</i> Tsuruoka Japan               | 0.244 | 0.011 |       |       |       |       |       |       |       |       |       |       |       |       |       |       |       |       |       |       |       |       |       |       |       |       |       |       |       |       |       |
| 4  | LC431582 <i>Macrobiotus</i> cf. <i>shonaicus</i> Oritsume Japan    | 0.247 | 0.013 | 0.005 |       |       |       |       |       |       |       |       |       |       |       |       |       |       |       |       |       |       |       |       |       |       |       |       |       |       |       |       |
| 5  | LC431583 <i>Macrobiotus</i> cf. <i>shonaicus</i> Hiyoshi Japan     | 0.248 | 0.003 | 0.011 | 0.013 |       |       |       |       |       |       |       |       |       |       |       |       |       |       |       |       |       |       |       |       |       |       |       |       |       |       |       |
| 6  | LC431584 <i>Macrobiotus</i> cf. <i>shonaicus</i> Kamiyoshida Japan | 0.245 | 0.008 | 0.003 | 0.008 | 0.011 |       |       |       |       |       |       |       |       |       |       |       |       |       |       |       |       |       |       |       |       |       |       |       |       |       |       |
| 7  | LC431585 <i>Macrobiotus</i> cf. <i>shonaicus</i> Shizuoka Japan    | 0.245 | 0.008 | 0.003 | 0.008 | 0.011 | 0.007 |       |       |       |       |       |       |       |       |       |       |       |       |       |       |       |       |       |       |       |       |       |       |       |       |       |
| 8  | LC431586 <i>Macrobiotus</i> cf. <i>shonaicus</i> Kyoto Japan       | 0.247 | 0.000 | 0.008 | 0.013 | 0.003 | 0.008 | 0.008 |       |       |       |       |       |       |       |       |       |       |       |       |       |       |       |       |       |       |       |       |       |       |       |       |
| 9  | LC431587 <i>Macrobiotus</i> cf. <i>shonaicus</i> Rokko Japan       | 0.247 | 0.010 | 0.002 | 0.007 | 0.013 | 0.005 | 0.005 | 0.010 |       |       |       |       |       |       |       |       |       |       |       |       |       |       |       |       |       |       |       |       |       |       |       |
| 10 | LC431588 <i>Macrobiotus</i> cf. <i>shonaicus</i> Bizan Japan       | 0.250 | 0.003 | 0.011 | 0.016 | 0.007 | 0.011 | 0.011 | 0.003 | 0.013 |       |       |       |       |       |       |       |       |       |       |       |       |       |       |       |       |       |       |       |       |       |       |
| 11 | LC431589 <i>Macrobiotus</i> cf. <i>shonaicus</i> Oki Japan         | 0.245 | 0.008 | 0.000 | 0.005 | 0.011 | 0.003 | 0.003 | 0.008 | 0.002 | 0.011 |       |       |       |       |       |       |       |       |       |       |       |       |       |       |       |       |       |       |       |       |       |
| 12 | LC431590 <i>Macrobiotus</i> cf. <i>shonaicus</i> Kagoshima Japan   | 0.247 | 0.010 | 0.002 | 0.007 | 0.013 | 0.005 | 0.005 | 0.010 | 0.000 | 0.013 | 0.002 |       |       |       |       |       |       |       |       |       |       |       |       |       |       |       |       |       |       |       |       |
| 13 | MH057763 <i>Macrobiotus papei</i> Tanzania                         | 0.252 | 0.217 | 0.217 | 0.214 | 0.217 | 0.220 | 0.219 | 0.219 | 0.217 | 0.222 | 0.219 | 0.217 |       |       |       |       |       |       |       |       |       |       |       |       |       |       |       |       |       |       |       |
| 14 | KY797267 <i>Macrobiotus scoticus</i> Scotland                      | 0.248 | 0.219 | 0.221 | 0.222 | 0.219 | 0.219 | 0.217 | 0.219 | 0.219 | 0.222 | 0.220 | 0.219 | 0.184 |       |       |       |       |       |       |       |       |       |       |       |       |       |       |       |       |       |       |
| 15 | KT951668 <i>Macrobiotus paulinae</i> Kenya                         | 0.233 | 0.220 | 0.222 | 0.219 | 0.222 | 0.217 | 0.219 | 0.221 | 0.222 | 0.224 | 0.221 | 0.222 | 0.202 | 0.205 |       |       |       |       |       |       |       |       |       |       |       |       |       |       |       |       |       |
| 16 | KX810011 <i>Macrobiotus polyipiformis</i> Ecuador                  | 0.251 | 0.196 | 0.199 | 0.197 | 0.196 | 0.196 | 0.196 | 0.192 | 0.197 | 0.196 | 0.196 | 0.197 | 0.235 | 0.229 | 0.203 |       |       |       |       |       |       |       |       |       |       |       |       |       |       |       |       |
| 17 | KX810012 <i>Macrobiotus polyipiformis</i> Ecuador                  | 0.254 | 0.199 | 0.202 | 0.201 | 0.199 | 0.199 | 0.199 | 0.196 | 0.201 | 0.199 | 0.199 | 0.201 | 0.240 | 0.226 | 0.207 | 0.029 |       |       |       |       |       |       |       |       |       |       |       |       |       |       |       |
| 18 | KC193572 <i>Macrobiotus kristenseni</i> Argentina                  | 0.268 | 0.213 | 0.211 | 0.209 | 0.209 | 0.209 | 0.209 | 0.211 | 0.213 | 0.215 | 0.211 | 0.213 | 0.224 | 0.208 | 0.213 | 0.229 | 0.233 |       |       |       |       |       |       |       |       |       |       |       |       |       |       |
| 19 | KC193573 <i>Macrobiotus kristenseni</i> Argentina                  | 0.269 | 0.214 | 0.214 | 0.212 | 0.212 | 0.212 | 0.212 | 0.214 | 0.216 | 0.218 | 0.214 | 0.216 | 0.228 | 0.212 | 0.212 | 0.230 | 0.234 | 0.000 |       |       |       |       |       |       |       |       |       |       |       |       |       |
| 20 | KC193574 <i>Macrobiotus kristenseni</i> Argentina                  | 0.259 | 0.220 | 0.222 | 0.219 | 0.219 | 0.219 | 0.219 | 0.219 | 0.219 | 0.223 | 0.221 | 0.219 | 0.209 | 0.206 | 0.208 | 0.230 | 0.235 | 0.014 | 0.014 |       |       |       |       |       |       |       |       |       |       |       |       |
| 21 | KC193575 <i>Macrobiotus kristenseni</i> Argentina                  | 0.259 | 0.220 | 0.220 | 0.217 | 0.217 | 0.217 | 0.217 | 0.217 | 0.217 | 0.220 | 0.219 | 0.217 | 0.209 | 0.204 | 0.208 | 0.228 | 0.232 | 0.014 | 0.014 | 0.000 |       |       |       |       |       |       |       |       |       |       |       |
| 22 | KC193576 <i>Macrobiotus kristenseni</i> Argentina                  | 0.259 | 0.220 | 0.220 | 0.217 | 0.217 | 0.217 | 0.217 | 0.217 | 0.217 | 0.220 | 0.219 | 0.217 | 0.209 | 0.204 | 0.208 | 0.228 | 0.232 | 0.014 | 0.014 | 0.000 | 0.000 |       |       |       |       |       |       |       |       |       |       |
| 23 | MK737919 <i>Macrobiotus noongaris</i> Australia                    | 0.241 | 0.204 | 0.207 | 0.202 | 0.199 | 0.197 | 0.199 | 0.197 | 0.202 | 0.201 | 0.201 | 0.202 | 0.237 | 0.215 | 0.214 | 0.213 | 0.218 | 0.215 | 0.214 | 0.232 | 0.232 | 0.232 |       |       |       |       |       |       |       |       |       |
| 24 | MK737920 <i>Macrobiotus kamilae</i> India                          | 0.246 | 0.222 | 0.224 | 0.227 | 0.222 | 0.223 | 0.230 | 0.223 | 0.225 | 0.227 | 0.227 | 0.225 | 0.221 | 0.226 | 0.212 | 0.207 | 0.209 | 0.241 | 0.242 | 0.245 | 0.242 | 0.242 | 0.225 |       |       |       |       |       |       |       |       |
| 25 | MK737921 <i>Macrobiotus kamilae</i> India                          | 0.246 | 0.222 | 0.224 | 0.227 | 0.222 | 0.223 | 0.230 | 0.223 | 0.225 | 0.227 | 0.227 | 0.225 | 0.221 | 0.226 | 0.212 | 0.207 | 0.209 | 0.241 | 0.242 | 0.245 | 0.242 | 0.242 | 0.227 | 0.002 |       |       |       |       |       |       |       |
| 26 | MW246133 <i>Macrobiotus sottilei</i> Poland                        | 0.264 | 0.192 | 0.193 | 0.196 | 0.196 | 0.196 | 0.192 | 0.192 | 0.197 | 0.196 | 0.196 | 0.197 | 0.211 | 0.210 | 0.210 | 0.210 | 0.210 | 0.221 | 0.224 | 0.229 | 0.226 | 0.226 | 0.209 | 0.215 | 0.215 |       |       |       |       |       |       |
| 27 | C4313 V2 COI                                                       | 0.271 | 0.209 | 0.209 | 0.206 | 0.209 | 0.209 | 0.204 | 0.206 | 0.206 | 0.209 | 0.207 | 0.206 | 0.204 | 0.221 | 0.212 | 0.204 | 0.212 | 0.249 | 0.253 | 0.244 | 0.241 | 0.241 | 0.223 | 0.218 | 0.218 | 0.204 |       |       |       |       |       |
| 28 | C4313 V3 COI                                                       | 0.276 | 0.209 | 0.212 | 0.207 | 0.210 | 0.210 | 0.206 | 0.207 | 0.207 | 0.210 | 0.209 | 0.207 | 0.205 | 0.221 | 0.214 | 0.209 | 0.216 | 0.245 | 0.246 | 0.240 | 0.239 | 0.239 | 0.228 | 0.218 | 0.218 | 0.209 | 0.006 |       |       |       |       |
| 29 | C4313 US3 COI                                                      | 0.276 | 0.209 | 0.212 | 0.207 | 0.210 | 0.210 | 0.206 | 0.207 | 0.207 | 0.210 | 0.209 | 0.207 | 0.206 | 0.222 | 0.215 | 0.210 | 0.218 | 0.245 | 0.246 | 0.240 | 0.239 | 0.239 | 0.229 | 0.219 | 0.219 | 0.209 | 0.006 | 0.000 |       |       |       |
| 30 | C4313 US4 COI                                                      | 0.276 | 0.207 | 0.211 | 0.207 | 0.210 | 0.210 | 0.206 | 0.207 | 0.207 | 0.210 | 0.209 | 0.207 | 0.206 | 0.222 | 0.215 | 0.209 | 0.217 | 0.245 | 0.246 | 0.240 | 0.239 | 0.239 | 0.228 | 0.218 | 0.218 | 0.209 | 0.006 | 0.000 | 0.000 |       |       |
| 31 | C4313 US5 COI                                                      | 0.273 | 0.209 | 0.209 | 0.204 | 0.208 | 0.208 | 0.203 | 0.204 | 0.204 | 0.208 | 0.206 | 0.204 | 0.203 | 0.220 | 0.211 | 0.204 | 0.212 | 0.249 | 0.253 | 0.243 | 0.240 | 0.240 | 0.222 | 0.216 | 0.216 | 0.206 | 0.000 | 0.006 | 0.006 | 0.006 |       |
| 32 | C4313 US8 COI                                                      | 0.272 | 0.205 | 0.206 | 0.206 | 0.209 | 0.209 | 0.204 | 0.206 | 0.206 | 0.209 | 0.207 | 0.206 | 0.205 | 0.219 | 0.210 | 0.200 | 0.208 | 0.253 | 0.255 | 0.247 | 0.245 | 0.245 | 0.219 | 0.218 | 0.218 | 0.206 | 0.002 | 0.006 | 0.006 | 0.006 | 0.002 |
